# Supplementary material
Source: Springer Nature journal article supplement (https://www.springermedizin.de/resource/supplementary/13058_2012_3163_MOESM1_ESM.pdf/9703400)
Supplement: MOESM1 [file 9703400]

Trial VIII  
Randomized  
1,111

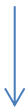

Excluded  
Assigned No Treatment arm 46  
Non-compliant Institution 2

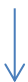

**Definitive trial population**

1,063

Goserelin 346  
CMF 360  
CMF ⇌ Goserelin 357

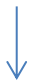

TMA analyzed for HER2  
FISH, cyclin D1 & p53  
417 (39%)

Goserelin 137  
CMF 134  
CMF ⇌ Goserelin 146

Trial IX  
Randomized  
1,715

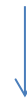

Excluded  
Ineligible 39  
Non-compliant Institution 7

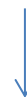

**Definitive trial population**

1,669

Tamoxifen 846  
CMF ⇌ tamoxifen 823

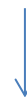

TMA analyzed for  
HER2 FISH, cyclin D1 & p53  
696 (42%)

Tamoxifen 352  
CMF ⇌ tamoxifen 344
